# Supplementary material for: Replication of machine learning methods to predict treatment outcome with antidepressant medications in patients with major depressive disorder from STAR*D and CAN-BIND-1
Source: PLoS One. 2021 Jun 28;16(6):e0253023. doi: 10.1371/journal.pone.0253023 (PMC8238228; doi:10.1371/journal.pone.0253023)
Supplement: S6 Table — (CSV) [file pone.0253023.s006.csv]

Rank	rf_full	rf_chi2	rf_elnet	gbdt_full	gbdt_chi2	gbdt_elnet	xgb_full	xgb_chi2	xgb_elnet	l2reg_full	l2reg_chi2	l2reg_elnet	elastic_net
1	qids01_w2c__qstot	imput_qidscpccg	imput_qidscpccg	qids01_w2c__qstot	qids01_w2c__qstot	pdsq01__emanx	imput_idsc5w2	pdsq01__anavd	pdsq01__trd2y	ccv01_w2__effct	sfhs01__sfhs03	pdsq01__emanx	qids01_w2c__qstot
2	imput_idsc5w2	pdsq01__teblk	pdsq01__temem	qids01_w2c__vmdsd	sfhs01__pcs12	phx01__bulimia||3	qids01_w2c__qstot	pdsq01__gap2w	pdsq01__tedis	pdsq01__frbus	qids01_w0sr__vmdsd	pdsq01__tegrd	qids01_w2sr__qstot
3	imput_qidscpccg	pdsq01__apt2y	pdsq01__spf2w	sfhs01__pcs12	imput_idsc5w2	qids01_w0c__vintr	qids01_w2c__vmdsd	mhx01__psmed	pdsq01__jmp2w	qids01_w2c__vmdsd	qids01_w2sr__vintr	pdsq01__dgfrd	imput_idsc5w2
4	qids01_w2sr__qstot	pdsq01__slp2y	pdsq01__sad2y	imput_idsc5w2	qlesq01__totqlesq	qids01_w0c__vcntr	qids01_w2sr__qstot	pdsq01__pechr	pdsq01__ebups	ucq01__ucq060	qids01_w0sr__vemin	imput_idsc5pccg	wsas01__totwsas
5	imput_idsc5pccg	pdsq01__trd2y	pdsq01__apt2y	qlesq01__totqlesq	qids01_w2sr__qstot	side_effects01__grseb	sfhs01__pcs12	pdsq01__glt2w	pdsq01__frbrg	dm01_enroll__resid||4.0	qids01_w2sr__vslow	phx01__alcsib	hrsd01__hdtot_r
6	qids01_w2c__vmdsd	pdsq01__cd2y	pdsq01__slp2y	imput_qidscpccg	phx01__episode_date	ucq01__ucq010	wsas01__totwsas	pdsq01__ebdt	pdsq01__ebvmt	ccv01_w2__stmed	phx01__suicsib	idsc01__iemin	qids01_w0sr__qstot
7	qlesq01__totqlesq	pdsq01__low2y	pdsq01__trd2y	dm01_enroll__empl||3.0	wsas01__totwsas	qids01_w0c__vsoin	qlesq01__totqlesq	pdsq01__tetht	pdsq01__obcnt	sfhs01__sfhs03	qlesq01__qlesq02	pdsq01__imagn	qids01_w0c__qstot
8	sfhs01__pcs12	pdsq01__hpl2y	pdsq01__cd2y	qids01_w2sr__qstot	interview_age	phx01__alcoh||1.0	dm01_enroll__empl||3.0	pdsq01__cd2y	pdsq01__ebhgy	pdsq01__anwor	qlesq01__qlesq04	phx01__drgchld	imput_gibbons
9	wsas01__totwsas	pdsq01__trexp	pdsq01__low2y	wsas01__totwsas	sfhs01__mcs12	phx01__suicpar	qids01_w2c__vsoin	pdsq01__obvlt	pdsq01__sad2y	qids01_w2c__vcntr	qlesq01__qlesq06	phx01__alcoh||1.0	imput_santen
10	qids01_w2sr__vmdsd	pdsq01__trwit	pdsq01__hpl2y	wsas01__wsas03	dm01_enroll__resm	qids01_w0sr__vmdsd	wsas01__wsas03	pdsq01__peimp	pdsq01__teblk	pdsq01__cd2y	qlesq01__qlesq08	pdsq01__ebups	wsas01__wsas03
11	qids01_w2c__vengy	pdsq01__tetht	pdsq01__trexp	qids01_w2c__vsoin	wsas01__wsas03	phx01__suic_phx	sfhs01__sfhs12	pdsq01__anbrt	pdsq01__teups	pdsq01__obvlt	qlesq01__qlesq10	phx01__ax_cocaine||2.0	imput_hamd7
12	wsas01__wsas03	pdsq01__teups	pdsq01__trwit	dm01_enroll__educat	dm01_w0__totincom	phx01__alcchld	ccv01_w2__effct	pdsq01__frlne	pdsq01__impwr	crs01__liverd	qlesq01__qlesq12	idsc01__iengy	imput_maier
13	phx01__episode_date	pdsq01__temem	pdsq01__tetht	phx01__episode_date	dm01_w0__mempl	phx01__depsib	wpai01__wpai_pctworked	pdsq01__obgrm	pdsq01__apt2y	idsc01__iapin	qlesq01__qlesq14	qids01_w2sr__vhysm	qids01_w2c__vmdsd
14	qids01_w0sr__qstot	pdsq01__tedis	pdsq01__teups	ccv01_w2__effct	qids01_w0sr__qstot	phx01__pd_paran	qids01_w2sr__vsoin	pdsq01__trexp	pdsq01__ebnge	pdsq01__trwit	imput_idsc5pccg	pdsq01__teshk	wpai01__wpai_pctmissed
15	interview_age	pdsq01__termd	pdsq01__tedis	dm01_enroll__resm	wpai01__wpai04	phx01__pd_border	qids01_w2sr__vmdsd	pdsq01__evy2w	pdsq01__obfgt	pdsq01__slp2y	qlesq01__qlesq16	qids01_w2sr__vsuic	imput_bech
16	qids01_w0c__qstot	pdsq01__spf2w	pdsq01__tht2w	phx01__dage	hrsd01__hdtot_r	phx01__aii_def	qlesq01__qlesq06	pdsq01__obstp	pdsq01__low2y	pdsq01__emanx	qids01_w0sr__vsoin	qids01_w2sr__vslow	wsas01__wsas04
17	sfhs01__mcs12	pdsq01__tefsh	pdsq01__teblk	side_effects01__grseb	wpai01__wpai_totalhrs	qids01_w0c__qstot	imput_qidscpccg	pdsq01__imcrl	pdsq01__obcln	imput_anyanxiety	sfhs01__sfhs01	ucq01__ucq080	ccv01_w2__medication1_dosage
18	hrsd01__hdtot_r	pdsq01__teshk	pdsq01__termd	sfhs01__mcs12	wpai01__wpai_pctworked	qids01_w0sr__vapdc	wpai01__wpai04	pdsq01__fravd	pdsq01__tedst	dm01_w0__inc_curr	phx01__bipsib	pdsq01__teups	qids01_w2c__vsoin
19	wsas01__wsas01	pdsq01__tedst	pdsq01__tefsh	imput_idsc5pccg	imput_gibbons	qlesq01__qlesq07	qids01_w2sr__vapdc	pdsq01__peslp	idsc01__iengy	pdsq01__spf2w	phx01__bip	qlesq01__qlesq06	qids01_w2sr__vvwsf
20	wsas01__wsas04	pdsq01__tenmb	pdsq01__teshk	qlesq01__qlesq06	qids01_w0c__qstot	qids01_w2sr__vmnin	wsas01__wsas04	pdsq01__pecnf	idsc01__iagit	pdsq01__tetht	qids01_w0c__vagit	pdsq01__evy2w	wpai01__wpai_totwrkimp
21	dm01_w0__totincom	pdsq01__tegug	pdsq01__tedst	interview_age	qids01_w2sr__vmdsd	qlesq01__qlesq12	side_effects01__grseb	idsc01__iwrse||3.0	pdsq01__ebwgh	pdsq01__obint	sfhs01__sfhs05	phx01__deppar	imput_idsc5w0
22	qids01_w2c__vintr	pdsq01__tegrd	pdsq01__tenmb	dm01_w0__mempl	ucq01__ucq070	qids01_w2sr__vslow	qlesq01__qlesq12	pdsq01__tedst	pdsq01__ansym	pdsq01__tedst	phx01__alcohol	qlesq01__qlesq07	side_effects01__grseb
23	phx01__dage	pdsq01__tejmp	pdsq01__tegug	dm01_w0__totincom	dm01_w0__minc_other	qids01_w2sr__vsuic	dm01_enroll__educat	pdsq01__ebnge	pdsq01__tegrd	idsc01__iagit	sfhs01__sfhs07	idsc01__ildn	qids01_w2c__vintr
24	qids01_w2c__vcntr	pdsq01__ebnge	pdsq01__tegrd	qids01_w2sr__vmdsd	imput_santen	qids01_w2sr__vvwsf	wsas01__wsas01	pdsq01__obrpt	pdsq01__imagn	sfhs01__sfhs07	sfhs01__sfhs09	qlesq01__qlesq12	qids01_w2c__vvwsf
25	qids01_w2c__vsoin	pdsq01__ebcrl	pdsq01__tejmp	qids01_w2sr__vsoin	dm01_w0__massist	qids01_w2sr__vhysm	imput_anyanxiety	pdsq01__teblk	pdsq01__tefsh	pdsq01__imvcs	qids01_w0c__vengy	phx01__bipchld	qids01_w2sr__vmdsd
26	dm01_enroll__educat	pdsq01__ebfl	pdsq01__ebnge	wpai01__wpai04	wpai01__wpai_pctactimp	qids01_w2sr__vemin	dm01_w0__mempl	pdsq01__anrsn	pdsq01__gap2w	pdsq01__frcwd	qids01_w2sr__vvwsf	wpai01__wpai02	wpai01__wpai_pctwrkimp
27	dm01_enroll__resm	pdsq01__ebhgy	pdsq01__ebcrl	side_effects01__fisin	wpai01__wpai_pctwrkimp	qids01_w2c__vsuic	side_effects01__fisin	pdsq01__tedis	pdsq01__neg2w	pdsq01__empty	qids01_w2sr__vwtin	dm01_enroll__privins||1.0	imput_hamdanx
28	qids01_w2sr__vvwsf	pdsq01__ebaln	pdsq01__ebfl	qids01_w2sr__vapdc	imput_hamdanx	qids01_w0sr__vsuic	sfhs01__sfhs03	pdsq01__ebfl	pdsq01__petlk	pdsq01__ebups	sfhs01__sfhs12	sfhs01__sfhs01	qids01_w2c__vengy
29	dm01_w0__mempl	pdsq01__sad2y	pdsq01__ser2w	idsc01__ianx	qids01_w2c__vmdsd	qids01_w2c__vwtin	sfhs01__sfhs08	pdsq01__spf2w	pdsq01__obvlt	crs01__neuro	qids01_w2sr__vapin	phx01__pd_nos	wpai01__wpai03
30	imput_gibbons	pdsq01__ser2w	pdsq01__btr2w	imput_anyanxiety	wpai01__wpai_pctmissed	qids01_w2c__vhysm	phx01__episode_date	pdsq01__trwit	pdsq01__tht2w	pdsq01__wysdt	qids01_w0sr__vcntr	qlesq01__qlesq10	qids01_w2c__vmnin
31	wpai01__wpai04	pdsq01__dkfam	idsc01__iengy	qlesq01__qlesq12	imput_hamdsle	sfhs01__sfhs05	ccv01_w2__remsn	pdsq01__tenmb	pdsq01__anavd	imput_idsc5w2	qids01_w0sr__vvwsf	pdsq01__temem	wpai01__wpai_pctworked
AUC: area-under-curve; rf: random forests; gbdt: gradient boosted decision tree; l2reg: l2 regularized logistic regression; chi2: clustering chi-squared feature selection; elnet: elastic net feature selection. Please see S2 for explanation of feature names.
