# Supplementary material for: Replication of machine learning methods to predict treatment outcome with antidepressant medications in patients with major depressive disorder from STAR*D and CAN-BIND-1
Source: PLoS One. 2021 Jun 28;16(6):e0253023. doi: 10.1371/journal.pone.0253023 (PMC8238228; doi:10.1371/journal.pone.0253023)
Supplement: S8 Table — (CSV) [file pone.0253023.s008.csv]

Balanced Accuracy two-tailed two-sided t-tests p-values
	rf_resp_bacc	gbdt_resp_bacc	xgb_resp_bacc	l2reg_resp_bacc	elastic_net_resp_bacc	rf_rem_bacc	gbdt_rem_bacc	xgb_rem_bacc	l2reg_rem_bacc	elastic_net_rem_bacc
rf_resp_bacc	1	2.55E-107	3.72E-31	6.50E-209	2.37E-80	1.03E-282	3.12E-275	3.69E-250	6.87E-268	1.03E-279
gbdt_resp_bacc	2.55E-107	1	5.65E-126	1.00E-179	0.180023638	3.36E-286	4.69E-280	1.03E-257	1.66E-273	4.34E-284
xgb_resp_bacc	3.72E-31	5.65E-126	1	1.03E-213	3.98E-99	4.88E-277	1.38E-270	1.21E-245	4.80E-262	1.36E-275
l2reg_resp_bacc	6.50E-209	1.00E-179	1.03E-213	1	8.20E-162	9.17E-299	3.61E-294	1.03E-276	1.22E-289	4.35E-297
elastic_net_resp_bacc	2.37E-80	0.180023638	3.98E-99	8.20E-162	1	1.43E-256	6.41E-257	3.70E-240	4.23E-246	6.67E-263
rf_rem_bacc	1.03E-282	3.36E-286	4.88E-277	9.17E-299	1.43E-256	1	3.28E-89	0.001533901	7.07E-92	1.45E-146
gbdt_rem_bacc	3.12E-275	4.69E-280	1.38E-270	3.61E-294	6.41E-257	3.28E-89	1	5.61E-59	7.09E-136	1.22E-87
xgb_rem_bacc	3.69E-250	1.03E-257	1.21E-245	1.03E-276	3.70E-240	0.001533901	5.61E-59	1	7.47E-72	6.53E-119
l2reg_rem_bacc	6.87E-268	1.66E-273	4.80E-262	1.22E-289	4.23E-246	7.07E-92	7.09E-136	7.47E-72	1	1.61E-171
elastic_net_rem_bacc	1.03E-279	4.34E-284	1.36E-275	4.35E-297	6.67E-263	1.45E-146	1.22E-87	6.53E-119	1.61E-171	1
AUC two-tailed two-sided t-tests p-values
	rf_resp_auc	gbdt_resp_auc	xgb_resp_auc	l2reg_resp_auc	elastic_net_resp_auc	rf_rem_auc	gbdt_rem_auc	xgb_rem_auc	l2reg_rem_auc	elastic_net_rem_auc
rf_resp_auc	1	2.05E-146	3.75E-28	1.09E-266	4.51E-94	0	0	0	0	0
gbdt_resp_auc	2.05E-146	1	7.44E-161	1.60E-293	1.10E-193	0	0	0	0	0
xgb_resp_auc	3.75E-28	7.44E-161	1	5.05E-263	1.84E-59	0	0	0	0	0
l2reg_resp_auc	1.09E-266	1.60E-293	5.05E-263	1	3.97E-279	0	0	0	0	0
elastic_net_resp_auc	4.51E-94	1.10E-193	1.84E-59	3.97E-279	1	0	0	0	0	0
rf_rem_auc	0	0	0	0	0	1	0.498474984	4.57E-39	1.13E-235	1.37E-236
gbdt_rem_auc	0	0	0	0	0	0.498474984	1	2.08E-42	1.52E-238	2.95E-240
xgb_rem_auc	0	0	0	0	0	4.57E-39	2.08E-42	1	5.38E-225	4.50E-224
l2reg_rem_auc	0	0	0	0	0	1.13E-235	1.52E-238	5.38E-225	1	2.25E-66
elastic_net_rem_auc	0	0	0	0	0	1.37E-236	2.95E-240	4.50E-224	2.25E-66	1
AUC: area-under-curve; rf: random forests; gbdt: gradient boosted decision tree; l2reg: l2 regularized logistic regression; resp: depression response; rem: depression remission
